# Supplementary material
Source: PubMed Central journal article supplement (PMC3240695)

Fig. S1-A. 2d-regulated network 1.

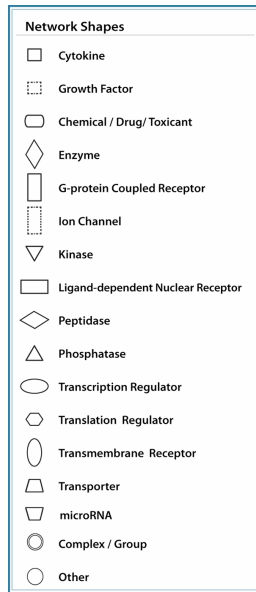

**Relationships**

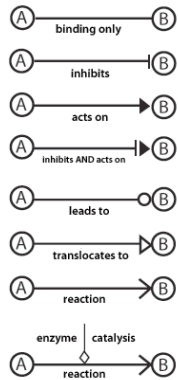

— direct interaction  
 - - - indirect interaction

Note: "Acts on" and "inhibits" edges may also include a binding event.

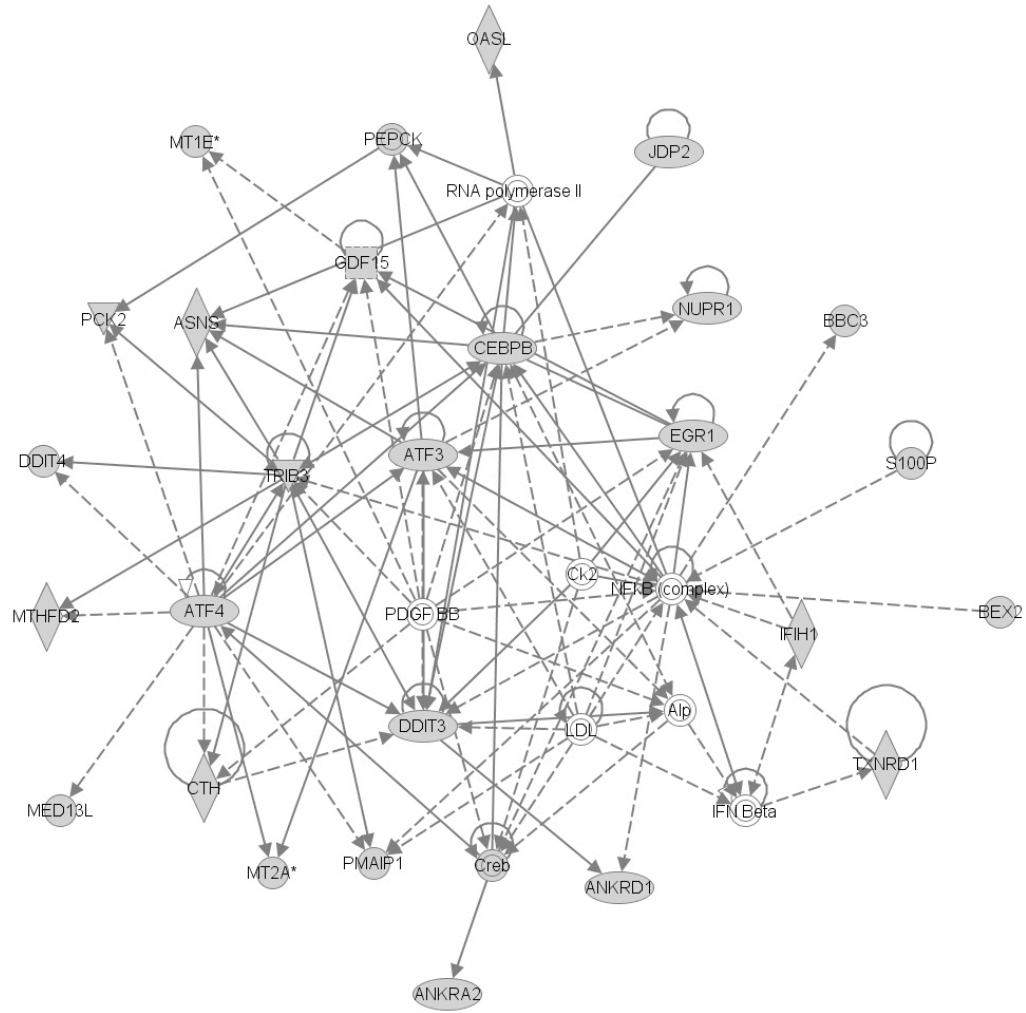

Fig. S1-B. 2d-regulated network 2

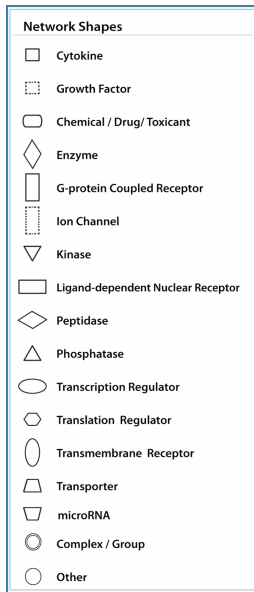

**Relationships**

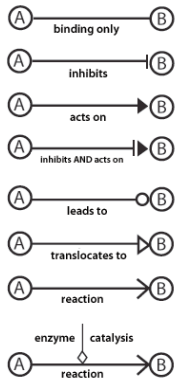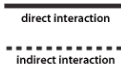

Note: "Acts on" and "inhibits" edges may also include a binding event.

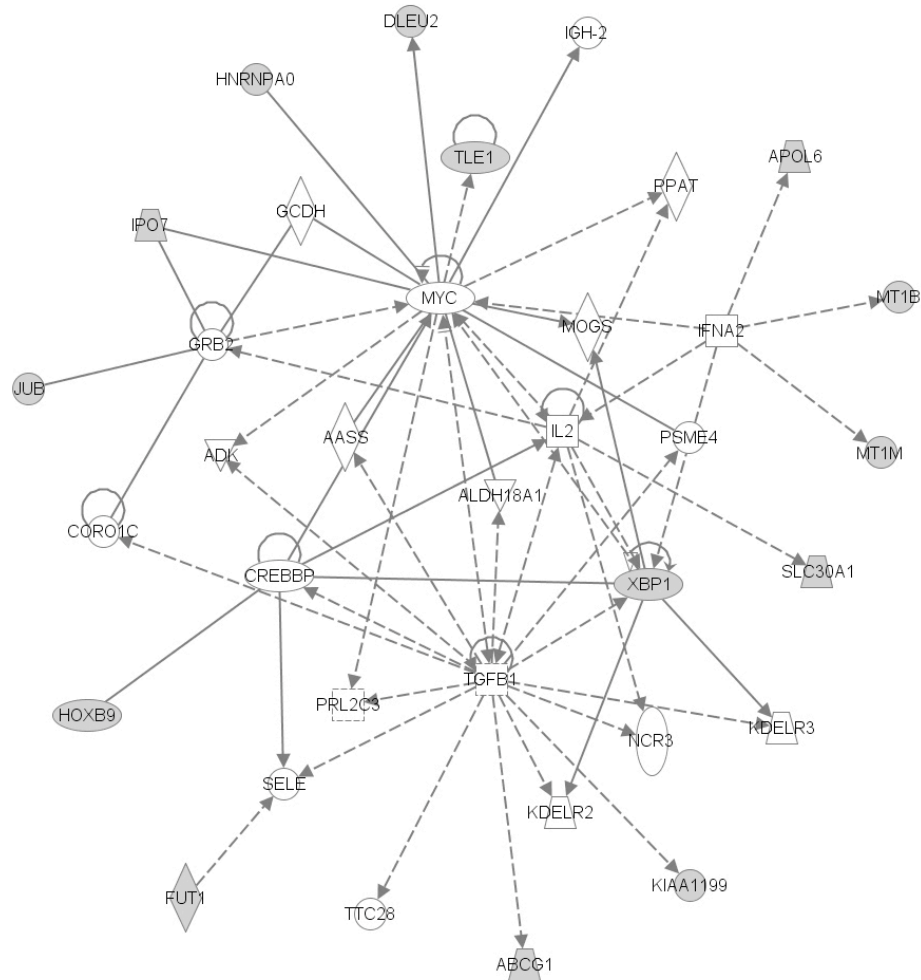

Fig. S1-C. 2d-regulated network 3.

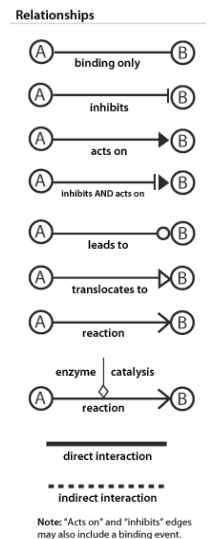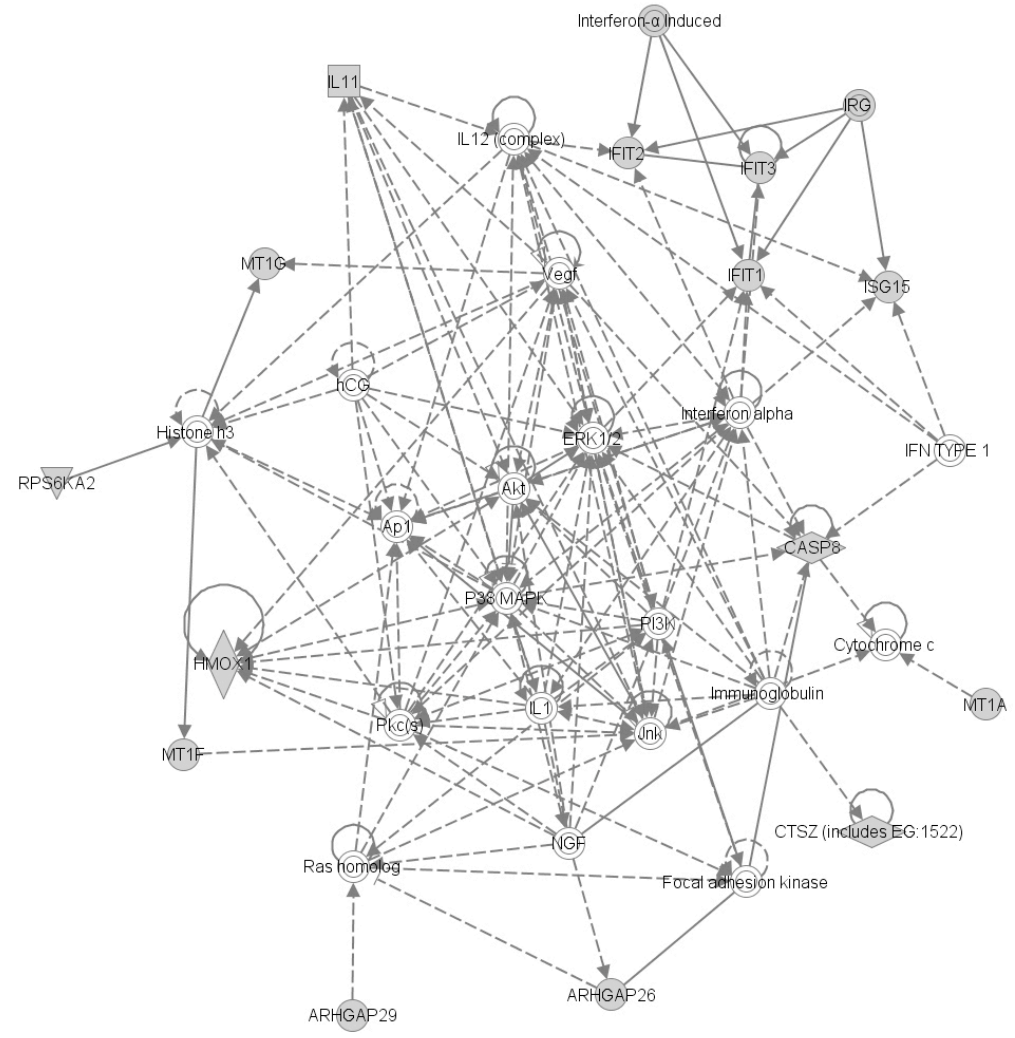

Fig. S1-D. PG11144-regulated network 1.



**Relationships**



— direct interaction  
 - - - indirect interaction

Note: "Acts on" and "inhibits" edges may also include a binding event.

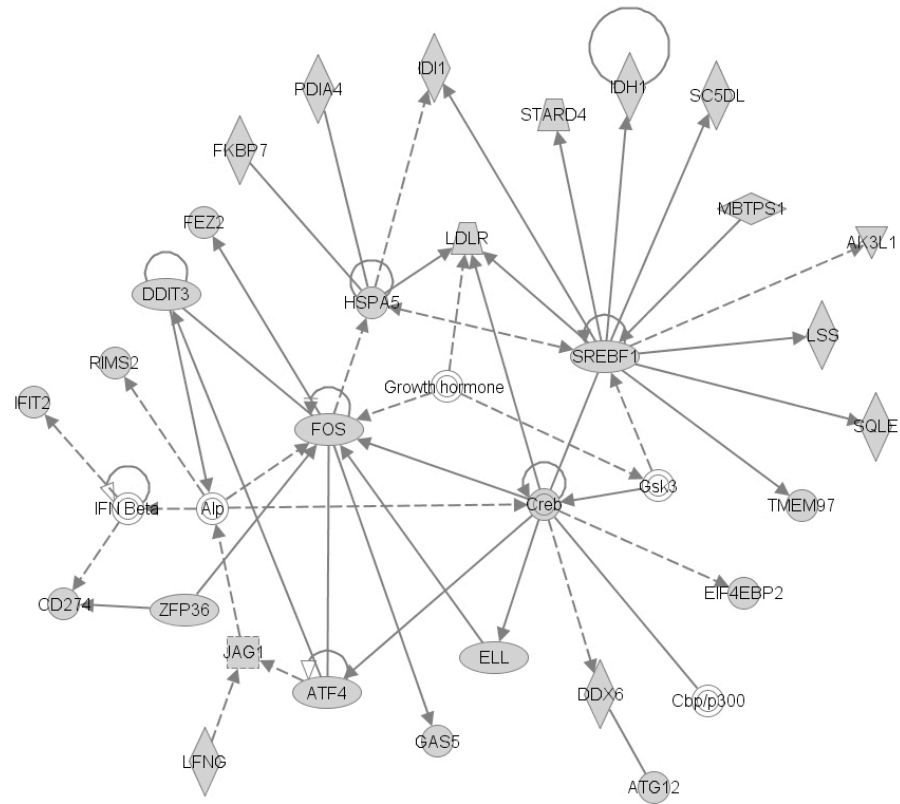

Fig. S1-E. PG11144-regulated network 2.

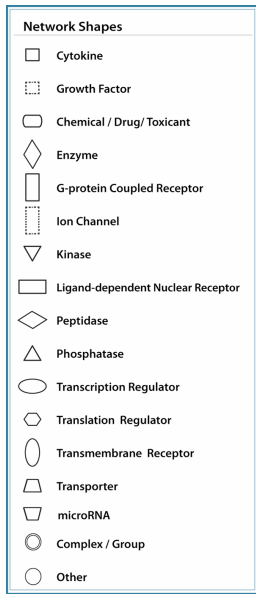

**Relationships**

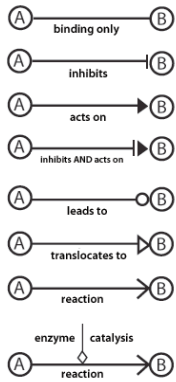

— direct interaction  
 - - - indirect interaction

Note: "Acts on" and "inhibits" edges may also include a binding event.

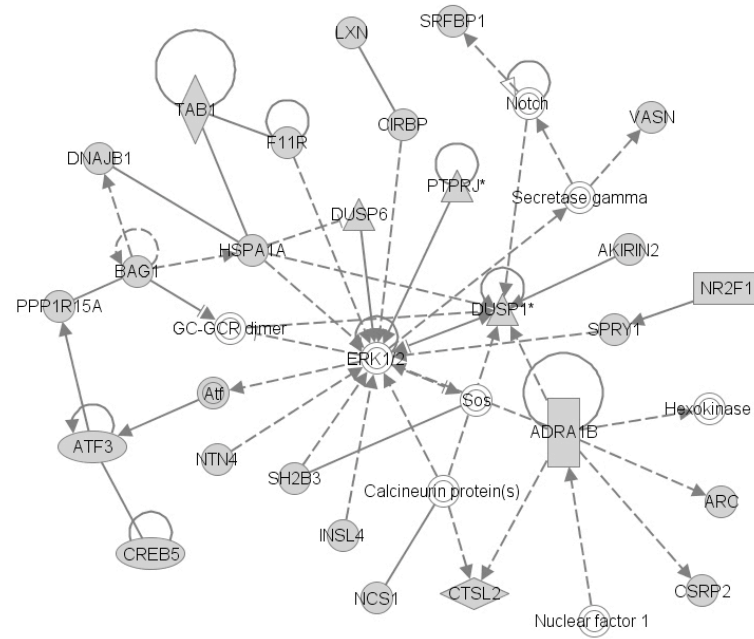

Fig. S1-F. PG11144-regulated network 3.



**Relationships**



— direct interaction  
 - - - indirect interaction

Note: "Acts on" and "inhibits" edges may also include a binding event.

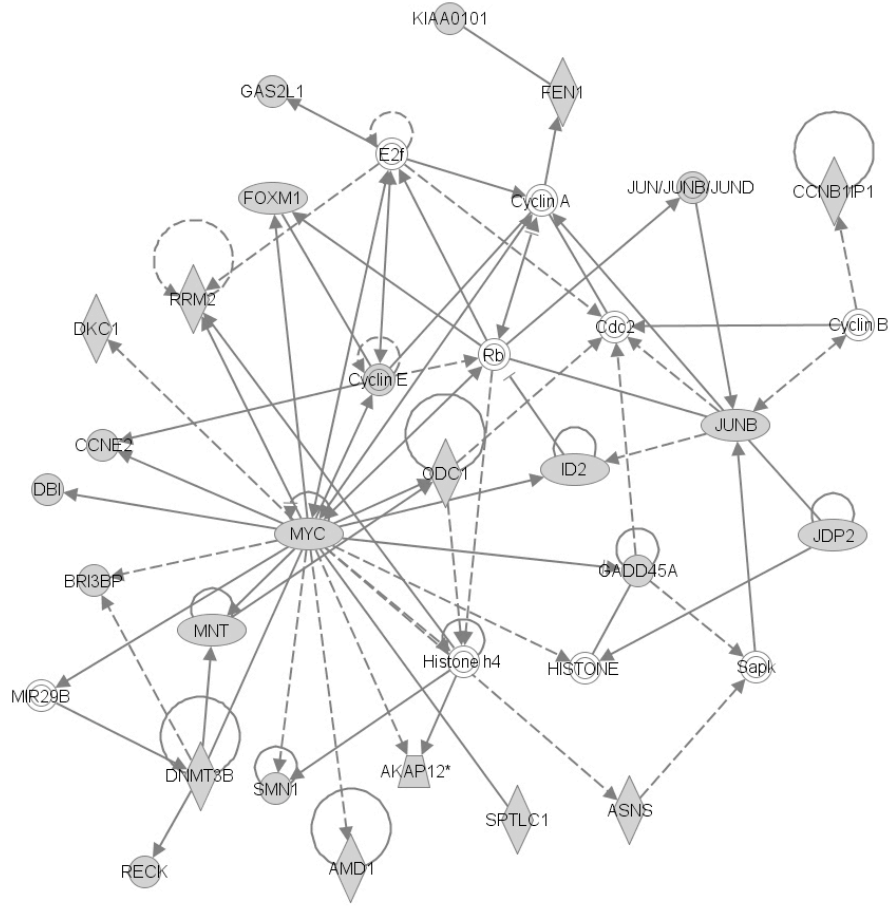

Supplement: NIHMS321623-supplement-01.pdf [file NIHMS321623-supplement-01.pdf]
